# Supplementary material for: In Silico Prediction of Skin Permeability Using a Two-QSAR Approach
Source: Pharmaceutics. 2022 Apr 28;14(5):961. doi: 10.3390/pharmaceutics14050961 (PMC9143389; doi:10.3390/pharmaceutics14050961)
Supplement: Supplementary file 1 [file pharmaceutics-14-00961-s001.zip › Tables S1¿CS3.xlsx]

## Sheet: Table S1
Table S1. Compound source for this study, their names, IUPAC names, CAS numbers, SMILES sTings, observed log Kp values, and predicted values by SVR A, SVR B, SVR C, HSVR, PLS, and CDC SPC, data partition, and reference.
No.	Molecules	IUPAC	CAS	Smiles	Obs. Log Kp	SVR A	|Δ|	SVR B	|Δ|	SVR C	|Δ|	HSVR	|Δ|	PLS	|Δ|	CDC caculator	|Δ|	Set†	References
1	p-Nitrophenol	4-nitrophenol	100-02-7	C1=CC(=CC=C1[N+](=O)[O-])O	-2.25337	-2.72997	0.476604	-2.81704	0.563674	-2.27409	0.0207242	-2.53523	0.281864	-2.7945	0.541132	-2.1	0.153366	T	Robert et al. 1977
2	p-Bromophenol	4-bromophenol	106-41-2	C1=CC(=CC=C1O)Br	-1.44225	-1.22982	0.212432	-1.40664	0.0356123	-1.44953	0.00727774	-1.32281	0.119442	-1.36036	0.0818914	-1.78	0.337748	T	Robert et al. 1977
3	p-Chlorophenol	4-chlorophenol	106-48-9	C1=CC(=CC=C1O)Cl	-1.44009	-1.18913	0.250963	-1.46005	0.0199566	-1.51318	0.0730866	-1.35128	0.0888134	-1.37959	0.0605057	-1.61	0.169907	T	Robert et al. 1977
4	Resorcinol	benzene-1,3-diol	108-46-3	C1=CC(=CC(=C1)O)O	-3.61979	-2.45275	1.16704	-2.71628	0.903509	-2.38048	1.23931	-2.50933	1.11046	-2.41054	1.20925	-3.06	0.559789	T	Robert et al. 1977
5	Toluene	toluene	108-88-3	CC1=CC=CC=C1	-0.0809219	0.0132063	0.0941282	-1.24953	1.16861	-1.54316	1.46224	-0.494586	0.413664	-0.894905	0.813983	-1.26	1.17908	T	Anderson et al. 1989
6	Phenol	phenol	108-95-2	C1=CC=C(C=C1)O	-2.08513	-1.83517	0.249958	-2.00503	0.0800982	-2.07824	0.00688818	-1.93809	0.147038	-1.77025	0.314877	-2.22	0.134872	T	Robert et al. 1977
7	Ethylene glycol mono iso-propyl ether (EGiPE) (2-Isopropoxyethanol)	2-propan-2-yloxyethanol	109-59-1	CC(C)OCCO	-3.44977	-3.20117	0.248602	-3.32488	0.124892	-3.05135	0.398422	-3.29462	0.155152	-3.16721	0.282565	-3.76	0.310228	T	Venier et al. 2004
8	2-Methoxyethanol	2-methoxyethanol	109-86-4	COCCO	-2.5391	-3.5919	1.0528	-3.68204	1.14294	-2.54644	0.00733784	-3.37155	0.832448	-3.49147	0.95237	-4.27	1.7309	T	Dugard et al. 1984
9	Ethylene glycol mono methyl ether acetate (EGMEA) (2-Methoxyethyl acetate)	2-methoxyethyl acetate	110-49-6	CC(=O)OCCOC	-2.87943	-3.3355	0.456074	-3.52842	0.648994	-2.88599	0.00656393	-3.33625	0.456824	-3.47539	0.595962	-3.83	0.950574	T	Venier et al. 2004
10	Hexanol	hexan-1-ol	111-27-3	CCCCCCO	-1.81816	-1.79115	0.0270064	-1.77627	0.0418864	-1.99163	0.173474	-1.76178	0.0563764	-1.85144	0.0332788	-1.71	0.108156	T	Bond et al. 1988
11	2-Butoxyethanol	2-butoxyethanol	111-76-2	CCCCOCCO	-3.66959	-2.71482	0.954766	-2.74023	0.929356	-2.74207	0.927516	-2.77793	0.891656	-2.73258	0.93701	-3.1	0.569586	T	Dugard et al. 1984
12	2-(2-Ethoxyethoxy) ethanol	2-(2-ethoxyethoxy)ethanol	111-90-0	CCOCCOCCO	-3.87943	-3.62828	0.251146	-3.75465	0.124776	-2.74142	1.13801	-3.50885	0.370576	-3.89444	0.0150131	-4.57	0.690574	T	Dugard et al. 1984
13	2,4-Dichlorophenol	2,4-dichlorophenol	120-83-2	C1=CC(=C(C=C1Cl)Cl)O	-1.22141	-1.33813	0.116715	-1.34663	0.125215	-1.89603	0.674615	-1.36699	0.145575	-0.978847	0.242567	-1.47	0.248585	T	Robert et al. 1977
14	p-Ethylphenol	4-ethylphenol	123-07-9	CCC1=CC=C(C=C1)O	-1.45767	-1.16706	0.290613	-1.35913	0.0985426	-1.74505	0.287377	-1.30292	0.154753	-1.44688	0.0107958	-1.46	0.00232738	T	Robert et al. 1977
15	Chlorodibromomethane	dibromo(chloro)methane	124-48-1	C(Cl)(Br)Br	-0.69897	-1.15769	0.45872	-0.574008	0.124962	-1.33486	0.63589	-0.68664	0.01233	-0.989177	0.290207	-2.39	1.69103	T	Xu et al. 2002
16	β-Naphthol (2-Naphthol)	naphthalen-2-ol	135-19-3	C1=CC=C2C=C(C=CC2=C1)O	-1.5544	-1.19502	0.359376	-1.17135	0.383046	-1.54725	0.0071458	-1.15799	0.396406	-1.31014	0.244254	-1.53	0.0243958	T	Robert et al. 1977
17	Lidocaine	2-(diethylamino)-N-(2,6-dimethylphenyl)acetamide	137-58-6	CCN(CC)CC(=O)NC1=C(C=CC=C1C)C	-2.4578	-2.70802	0.250223	-2.48422	0.0264228	-2.53591	0.0781128	-2.5236	0.0658028	-2.80591	0.34811	N/A‡	N/A	T	Johnson et al. 1996 MiTagoTi et al. 1996
18	Methyl 4-hydroxyphenylacetate	methyl 2-(4-hydroxyphenyl)acetate	14199-15-6	COC(=O)CC1=CC=C(C=C1)O	-1.69897	-1.81091	0.11194	-1.73854	0.03957	-1.8424	0.14343	-1.68589	0.01308	-2.66384	0.964867	N/A	N/A	T	Anderson et al. 1989
19	Pregnenolone	1-[(3S,8S,9S,10R,13S,14S,17S)-3-hydroxy-10,13-dimethyl-2,3,4,7,8,9,11,12,14,15,16,17-dodecahydro-1H-cyclopenta[a]phenanthren-17-yl]ethanone	145-13-1	CC(=O)C1CCC2C1(CCC3C2CC=C4C3(CCC(C4)O)C)C	-2.82391	-2.57374	0.250169	-2.6993	0.124609	-2.48814	0.335769	-2.58459	0.239319	-2.37698	0.446928	-1.59	1.23391	T	Scheuplein et al. 1969
20	4-Hydroxyphenylacetic acid	2-(4-hydroxyphenyl)acetic acid	156-38-7	C1=CC(=CC=C1CC(=O)O)O	-2.60206	-2.65489	0.05283	-2.48105	0.12101	-2.59513	0.00692999	-2.55271	0.04935	-2.86441	0.262352	N/A	N/A	T	Anderson et al. 1989
21	Ibuprofen	2-[4-(2-methylpropyl)phenyl]propanoic acid	15687-27-1	CC(C)CC1=CC=C(C=C1)C(C)C(=O)O	-1.44	-1.19578	0.24422	-1.5475	0.1075	-2.16715	0.72715	-1.53974	0.09974	-1.62307	0.183073	-1.22	0.22	T	Degim et al. 1998
22	4-Hydroxyphenylacetamide	2-(4-hydroxyphenyl)acetamide	17194-82-0	C1=CC(=CC=C1CC(=O)N)O	-3.34679	-3.18608	0.160707	-3.12749	0.219297	-2.94635	0.400437	-3.16749	0.179297	-3.35387	0.00708065	N/A	N/A	T	Anderson et al. 1989
23	Ethylene glycol mono n-propyl ether (EGnPE) (2-Propoxyethanol)	2-propoxyethanol	2807-30-9	CCCOCCO	-3.36653	-3.11675	0.249782	-3.21809	0.148442	-2.93539	0.431142	-3.17319	0.193342	-3.04852	0.318015	-3.73	0.363468	T	Venier et al. 2004
24	Hydroxypregnenolone	1-[(3S,8R,9S,10R,13S,14S,17R)-3,17-dihydroxy-10,13-dimethyl-1,2,3,4,7,8,9,11,12,14,15,16-dodecahydrocyclopenta[a]phenanthren-17-yl]ethanone	387-79-1	CC(=O)C1(CCC2C1(CCC3C2CC=C4C3(CCC(C4)O)C)C)O	-3.22185	-2.97201	0.249839	-3.09718	0.124669	-3.04888	0.172969	-3.14822	0.0736287	-3.32213	0.100283	-2.19	1.03185	T	Scheuplein et al. 1969
25	Fentanyl	N-phenyl-N-[1-(2-phenylethyl)piperidin-4-yl]propanamide	437-38-7	CCC(=O)N(C1CCN(CC1)CCC2=CC=CC=C2)C3=CC=CC=C3	-2.25181	-2.50151	0.249698	-2.37669	0.124878	-2.25853	0.00671803	-2.28285	0.031038	-2.66909	0.417277	-1.89	0.361812	T	Roy et al. 1989
26	Hydromorphone	(4R,4aR,7aR,12bS)-9-hydroxy-3-methyl-1,2,4,4a,5,6,7a,13-octahydro-4,12-methanobenzofuro[3,2-e]isoquinolin-7-one	466-99-9	CN1CCC23C4C1CC5=C2C(=C(C=C5)O)OC3C(=O)CC4	-4.82391	-4.57401	0.249899	-4.65661	0.167299	-3.21503	1.60888	-4.67948	0.144429	-3.79511	1.0288	-3.66	1.16391	T	Roy et al. 1989
27	Dexamethasone	(8S,9R,10S,11S,13S,14S,16R,17R)-9-fluoro-11,17-dihydroxy-17-(2-hydroxyacetyl)-10,13,16-Timethyl-6,7,8,11,12,14,15,16-octahydrocyclopenta[a]phenanthren-3-one	50-02-2	CC1CC2C3CCC4=CC(=O)C=CC4(C3(C(CC2(C1(C(=O)CO)O)C)O)F)C	-4.19382	-4.20059	0.00676997	-4.06866	0.12516	-3.40726	0.78656	-4.16778	0.02604	-4.89456	0.700744	N/A	N/A	T	Johnson et al. 1996
28	Corticosterone	(8S,9S,10R,11S,13S,14S,17S)-11-hydroxy-17-(2-hydroxyacetyl)-10,13-dimethyl-1,2,6,7,8,9,11,12,14,15,16,17-dodecahydrocyclopenta[a]phenanthren-3-one	50-22-6	CC12CCC(=O)C=C1CCC3C2C(CC4(C3CCC4C(=O)CO)C)O	-4.06215	-4.31222	0.250072	-4.52018	0.458032	-2.83779	1.22436	-4.37553	0.313382	-4.1911	0.128953	-3.76	0.302148	T	Scheuplein et al. 1969；Johnson et al. 1996；MiTagoTi et al. 1996
29	Hydrocortisone	(8S,9S,10R,11S,13S,14S,17R)-11,17-dihydroxy-17-(2-hydroxyacetyl)-10,13-dimethyl-2,6,7,8,9,11,12,14,15,16-decahydro-1H-cyclopenta[a]phenanthren-3-one	50-23-7	CC12CCC(=O)C=C1CCC3C2C(CC4(C3CCC4(C(=O)CO)O)C)O	-5.52288	-5.02507	0.497809	-4.87509	0.647789	-3.89162	1.63126	-4.88718	0.635699	-4.92385	0.59903	-4.29	1.23288	T	Scheuplein et al. 1969
30	Estradiol	(8R,9S,13S,14S,17S)-13-methyl-6,7,8,9,11,12,14,15,16,17-decahydrocyclopenta[a]phenanthrene-3,17-diol	50-28-2	CC12CCC3C(C1CCC2O)CCC4=C3C=CC(=C4)O	-2.47023	-2.21976	0.250468	-2.54134	0.0711125	-2.49271	0.0224825	-2.46576	0.00446755	-2.01987	0.450362	N/A	N/A	T	MiTagoTi et al. 1996；MiTagoTi 2000；Johnson et al. 1996
31	Aspirin	2-acetyloxybenzoic acid	50-78-2	CC(=O)OC1=CC=CC=C1C(=O)O	-2.14	-2.2479	0.1079	-2.1342	0.0058	-2.13302	0.00698	-2.06631	0.07369	-2.90799	0.767985	-3.24	1.1	T	Degim et al. 1998
32	1,1-Dichloropropanone	1,1-dichloropropan-2-one	513-88-2	CC(=O)C(Cl)Cl	-1.36653	-2.4015	1.03497	-2.40125	1.03472	-2.11351	0.746978	-2.20875	0.842218	-2.1864	0.819868	N/A	N/A	T	Xu et al. 2002
33	Aldosterone	(8S,9S,10R,11S,13R,14S,17S)-11-hydroxy-17-(2-hydroxyacetyl)-10-methyl-3-oxo-1,2,6,7,8,9,11,12,14,15,16,17-dodecahydrocyclopenta[a]phenanthrene-13-carbaldehyde	52-39-1	CC12CCC(=O)C=C1CCC3C2C(CC4(C3CCC4C(=O)CO)C=O)O	-4.39794	-4.64815	0.25021	-4.89494	0.497	-3.8338	0.56414	-4.55086	0.15292	-5.0421	0.644156	-4.9	0.50206	T	MiTagoTi et al. 1996 ；MiTagoTi 2000
34	Cortisone	(8S,9S,10R,13S,14S,17R)-17-hydroxy-17-(2-hydroxyacetyl)-10,13-dimethyl-1,2,6,7,8,9,12,14,15,16-decahydrocyclopenta[a]phenanthrene-3,11-dione	53-06-5	CC12CCC(=O)C=C1CCC3C2C(=O)CC4(C3CCC4(C(=O)CO)O)C	-5	-5.24998	0.24998	-4.87504	0.12496	-3.99148	1.00852	-5.03086	0.03086	-4.96953	0.0304693	-4.44	0.56	T	Scheuplein et al. 1969
35	Estrone	(8R,9S,13S,14S)-3-hydroxy-13-methyl-7,8,9,11,12,14,15,16-octahydro-6H-cyclopenta[a]phenanthren-17-one	53-16-7	CC12CCC3C(C1CCC2=O)CCC4=C3C=CC(=C4)O	-2.4437	-2.20609	0.237607	-2.56882	0.125123	-2.43672	0.0069775	-2.44302	0.000677499	-2.03006	0.413633	-2.16	0.283697	T	Scheuplein et al. 1969
36	Bromochloroacetic acid	2-bromo-2-chloroacetic acid	5589-96-8	C(C(=O)O)(Cl)Br	-2.79588	-2.54702	0.24886	-2.57589	0.21999	-2.6328	0.16308	-2.61107	0.18481	-2.30102	0.494857	N/A	N/A	T	Xu et al. 2002
37	Urea	urea	57-13-6	C(=O)(N)N	-3.82974	-4.07969	0.249952	-3.95417	0.124432	-2.739	1.09074	-3.91515	0.0854117	-3.79925	0.0304919	-5.27	1.44026	T	Barber et al. 1992
38	Morphine	(4R,4aR,7S,7aR,12bS)-3-methyl-2,4,4a,7,7a,13-hexahydro-1H-4,12-methanobenzofuro[3,2-e]isoquinoline-7,9-diol	57-27-2	CN1CCC23C4C1CC5=C2C(=C(C=C5)O)OC3C(C=C4)O	-5.03152	-4.78157	0.249947	-4.90708	0.124437	-3.23603	1.79549	-4.962	0.0695171	-4.16712	0.8644	-4.47	0.561517	T	Roy et al. 1989
39	Meperidine	ethyl 1-methyl-4-phenylpiperidine-4-carboxylate	57-42-1	CCOC(=O)C1(CCN(CC1)C)C2=CC=CC=C2	-2.4318	-2.6312	0.199402	-2.55651	0.124712	-2.52813	0.0963317	-2.54903	0.117232	-2.74878	0.316979	-2.24	0.191798	T	Roy et al. 1989
40	Monopropylene glycol (MPG)	propane-1,2-diol	57-55-6	CC(CO)O	-4.02319	-3.77299	0.250202	-3.75766	0.265532	-2.64139	1.3818	-3.56242	0.460772	-3.6167	0.406494	-4.4	0.376808	T	Fasano et al. 2011
41	Progesterone	(8S,9S,10R,13S,14S,17S)-17-acetyl-10,13-dimethyl-1,2,6,7,8,9,11,12,14,15,16,17-dodecahydrocyclopenta[a]phenanthren-3-one	57-83-0	CC(=O)C1CCC2C1(CCC3C2CCC4=CC(=O)CCC34C)C	-1.96859	-2.21832	0.249728	-2.73097	0.762378	-2.32341	0.354818	-2.442	0.473408	-2.42378	0.455185	-1.91	0.0585915	T	Scheuplein et al. 1969；MiTagoTi 2000
42	Estriol	(8R,9S,13S,14S,16R,17R)-13-methyl-6,7,8,9,11,12,14,15,16,17-decahydrocyclopenta[a]phenanthrene-3,16,17-Triol	50-27-1	CC12CCC3C(C1CC(C2O)O)CCC4=C3C=CC(=C4)O	-4.39794	-4.14762	0.25032	-3.77081	0.62713	-2.53509	1.86285	-3.79652	0.60142	-3.12721	1.27073	-2.76	1.63794	T	Scheuplein et al. 1969
43	Testosterone	(8R,9S,10R,13S,14S,17S)-17-hydroxy-10,13-dimethyl-1,2,6,7,8,9,11,12,14,15,16,17-dodecahydrocyclopenta[a]phenanthren-3-one	58-22-0	CC12CCC3C(C1CCC2O)CCC4=CC(=O)CCC34C	-2.90802	-2.65842	0.249597	-2.89015	0.0178667	-2.68588	0.222137	-2.79456	0.113457	-2.41175	0.496264	-2.16	0.748017	T	Scheuplein et al. 1969；MiTagoTi 2000；Netzlaff et al. 2006； Schäfer-Korting et al. 2006
44	Chlorocresol	4-chloro-3-methylphenol	59-50-7	CC1=C(C=CC(=C1)O)Cl	-1.25995	-1.20925	0.0507033	-1.30738	0.0474267	-1.54073	0.280777	-1.25775	0.00220328	-1.23958	0.0203758	-1.35	0.0900467	T	Robert et al. 1977
45	Ethyl ether	ethoxyethane	60-29-7	CCOCC	-1.79588	-2.37808	0.5822	-2.38975	0.59387	-2.4086	0.61272	-2.36632	0.57044	-2.23802	0.442144	-2.66	0.86412	T	Blank et al. 1967
46	4-Hydroxybenzyl alcohol	4-(hydroxymethyl)phenol	623-05-2	C1=CC(=CC=C1CO)O	-2.69897	-2.64904	0.04993	-2.72529	0.02632	-2.64794	0.05103	-2.70368	0.00471	-2.65265	0.0463233	N/A	N/A	T	Anderson et al. 1989
47	Dibromoacetic acid	2,2-dibromoacetic acid	631-64-1	C(C(=O)O)(Br)Br	-2.58503	-2.49466	0.0903667	-2.45963	0.125397	-2.59246	0.00743335	-2.52294	0.0620867	-2.26308	0.32195	N/A	N/A	T	Xu et al. 2002
48	Ethanol	ethanol	64-17-5	CCO	-3.52288	-3.77351	0.250631	-3.39764	0.125239	-2.87458	0.648299	-3.49226	0.0306187	-2.75715	0.765724	-3.59	0.0671213	T	Blank 1964
49	Cortexone	(8S,9S,10R,13S,14S,17S)-17-(2-hydroxyacetyl)-10,13-dimethyl-1,2,6,7,8,9,11,12,14,15,16,17-dodecahydrocyclopenta[a]phenanthren-3-one	64-85-7	CC12CCC3C(C1CCC2C(=O)CO)CCC4=CC(=O)CCC34C	-3.34679	-3.35497	0.00818251	-3.27293	0.0738575	-3.14898	0.197807	-3.37849	0.0317025	-3.28519	0.0615984	-2.78	0.566787	T	Scheuplein et al. 1969
50	Nicorandil	2-(pyridine-3-carbonylamino)ethyl niTate	65141-46-0	C1=CC(=CN=C1)C(=O)NCCO[N+](=O)[O-]	-3.57512	-3.82547	0.250352	-3.69961	0.124492	-3.13734	0.437778	-3.7512	0.176082	-4.32803	0.752914	N/A	N/A	T	Sato et al. 1991
51	Benzoic acid	benzoic acid	65-85-0	C1=CC=C(C=C1)C(=O)O	-1.87664	-1.99104	0.114396	-2.00198	0.125336	-2.01974	0.143096	-1.92433	0.0476861	-2.01311	0.136463	-2.01	0.133356	T	Netzlaff et al. 2006 Degim et al. 1998
52	Chloroform (Trichloromethane)	chloroform	67-66-3	C(Cl)(Cl)Cl	-0.79588	-1.21933	0.42345	-0.794311	0.00156902	-1.54255	0.74667	-0.866636	0.070756	-1.14	0.34412	-1.89	1.09412	T	Xu et al. 2002
53	Hydroxyprogesterone	(8R,9S,10R,13S,14S,17R)-17-acetyl-17-hydroxy-10,13-dimethyl-2,6,7,8,9,11,12,14,15,16-decahydro-1H-cyclopenta[a]phenanthren-3-one	68-96-2	CC(=O)C1(CCC2C1(CCC3C2CCC4=CC(=O)CCC34C)C)O	-3.22185	-3.30783	0.0859813	-3.22066	0.00118875	-3.12752	0.0943287	-3.33309	0.111241	-3.33396	0.112106	-2.59	0.631849	T	Scheuplein et al. 1969
54	Salicylic acid	2-hydroxybenzoic acid	69-72-7	C1=CC=C(C(=C1)C(=O)O)O	-2.1579	-2.36513	0.207235	-2.28297	0.125075	-2.31445	0.156555	-2.25433	0.0964348	-2.48611	0.328217	-1.77	0.387895	T	MiTagoTi et al. 1996 Degim et al. 1998
55	Butanol	butan-1-ol	71-36-3	CCCCO	-2.58503	-2.33679	0.248237	-2.42838	0.156647	-2.56305	0.0219767	-2.47156	0.113467	-2.21498	0.370044	-2.67	0.0849733	T	Blank et al. 1967 ；MiTagoTi et al. 1996
56	Benzene	benzene	71-43-2	C1=CC=CC=C1	-0.954286	-0.70369	0.250596	-1.11825	0.163964	-1.56008	0.605794	-0.929402	0.0248839	-1.12516	0.170871	-1.47	0.515714	T	Blank et al. 1985
57	Bromoform	bromoform	75-25-2	C(Br)(Br)Br	-0.677781	-1.16647	0.488689	-0.552575	0.125206	-1.52834	0.850559	-0.646255	0.0315257	-0.86867	0.190889	-2.52	1.84222	T	Xu et al. 2002
58	Bromodichloromethane	bromo(dichloro)methane	75-27-4	C(Cl)(Cl)Br	-0.744727	-1.28006	0.535333	-0.654489	0.0902385	-1.33761	0.592883	-0.775774	0.0310465	-1.10794	0.363215	N/A	N/A	T	Xu et al. 2002
59	Trimethylamine	N,N-dimethylmethanamine	75-50-3	CN(C)C	-3.70997	-3.25302	0.456945	-3.09415	0.615815	-3.14655	0.563415	-3.2763	0.433665	-2.74849	0.961473	-3.26	0.449965	T	Kenyon et al. 2004
60	Trichloroacetic acid	2,2,2-Trichloroacetic acid	76-03-9	C(=O)(C(Cl)(Cl)Cl)O	-2.72125	-2.18031	0.540936	-2.20897	0.512276	-2.44501	0.276236	-2.27183	0.449416	-2.12107	0.600181	-2.94	0.218754	T	Xu et al. 2002
61	Codeine	(4R,4aR,7S,7aR,12bS)-9-methoxy-3-methyl-2,4,4a,7,7a,13-hexahydro-1H-4,12-methanobenzofuro[3,2-e]isoquinolin-7-ol	76-57-3	CN1CCC23C4C1CC5=C2C(=C(C=C5)OC)OC3C(C=C4)O	-4.3098	-4.55967	0.249866	-5.19961	0.889806	-3.97038	0.339424	-4.34078	0.0309761	-4.16079	0.149012	-4.25	0.0598039	T	Roy et al. 1989
62	2-Butanone	butan-2-one	78-93-3	CCC(=O)C	-2.34679	-2.66234	0.315553	-2.77622	0.429433	-2.78	0.433213	-2.80655	0.459763	-2.44776	0.10097	-3.25	0.903213	T	Blank et al. 1967
63	Bromoacetic acid	2-bromoacetic acid	79-08-3	C(C(=O)O)Br	-2.85387	-3.00546	0.151588	-3.00891	0.155038	-2.84668	0.00719196	-3.01437	0.160498	-2.64014	0.213731	N/A	N/A	T	Xu et al. 2002
64	Chloroacetic acid	2-chloroacetic acid	79-11-8	C(C(=O)O)Cl	-2.95861	-3.20732	0.248713	-3.1771	0.218493	-2.89094	0.0676673	-3.16484	0.206233	-2.72819	0.230415	-3.51	0.551393	T	Xu et al. 2002
65	Dichloroacetic acid	2,2-dichloroacetic acid	79-43-6	C(C(=O)O)(Cl)Cl	-2.72125	-2.63441	0.0868364	-2.76084	0.0395936	-2.71435	0.0068964	-2.75606	0.0348136	-2.3993	0.321948	-3.09	0.368754	T	Xu et al. 2002
66	Chloroxylenol	4-chloro-3,5-dimethylphenol	88-04-0	CC1=CC(=CC(=C1Cl)C)O	-1.22885	-1.47842	0.249566	-1.21271	0.0161437	-1.72881	0.499956	-1.26065	0.0317963	-1.20777	0.0210803	-1.35	0.121146	T	Robert et al. 1977
67	2,4,6-Trichlorophenol	2,4,6-Trichlorophenol	88-06-2	C1=C(C=C(C(=C1Cl)O)Cl)Cl	-1.22621	-1.47631	0.250096	-1.35085	0.124636	-2.04599	0.819776	-1.43806	0.211846	-0.574549	0.651665	-1.33	0.103786	T	Robert et al. 1977
68	Thymol	5-methyl-2-propan-2-ylphenol	89-83-8	CC1=CC(=C(C=C1)C(C)C)O	-1.27737	-1.52744	0.250074	-1.15197	0.125396	-1.91389	0.636524	-1.25481	0.0225561	-1.28839	0.0110195	-1.31	0.0326339	T	Robert et al. 1977
69	1,1,1-Trichloropropanone	1,1,1-Trichloropropan-2-one	918-00-3	CC(=O)C(Cl)(Cl)Cl	-1.61979	-1.80214	0.182351	-1.91281	0.293021	-1.94941	0.329621	-1.82934	0.209551	-1.96803	0.348245	N/A	N/A	T	Xu et al. 2002
70	Methyl nicotinate	methyl pyridine-3-carboxylate	93-60-7	COC(=O)C1=CN=CC=C1	-2.41	-2.96945	0.55945	-2.97249	0.56249	-2.72583	0.31583	-2.92101	0.51101	-3.05088	0.640877	N/A	N/A	T	Degim et al. 1998
71	Butyl paraben (BP)	butyl 4-hydroxybenzoate	94-26-8	CCCCOC(=O)C1=CC=C(C=C1)O	-0.9813	-0.731628	0.249672	-1.10693	0.12563	-1.99153	1.01023	-0.949809	0.0314905	-2.044	1.0627	N/A	N/A	T	Akomeah et al. 2007
72	o-Cresol	2-methylphenol	95-48-7	CC1=CC=CC=C1O	-1.80355	-1.51984	0.283707	-1.63748	0.166067	-1.81009	0.00654254	-1.58222	0.221327	-1.63444	0.169104	-1.82	0.0164525	T	Robert et al. 1977
73	Methyl paraben (MP)	methyl 4-hydroxybenzoate	99-76-3	COC(=O)C1=CC=C(C=C1)O	-1.67358	-1.92464	0.251058	-1.79818	0.124598	-1.97809	0.304508	-1.77933	0.105748	-2.44879	0.775205	-2.15	0.476418	T	Akomeah et al. 2007
74	p-Cresol	4-methylphenol	106-44-5	CC1=CC=C(C=C1)O	-1.16266	-1.56965	0.406986	-1.66366	0.500996	-1.81463	0.651966	-1.60737	0.444706	-1.66297	0.500307	-1.83	0.667336	t	Robert et al. 1977 Anderson et al. 1989
75	1-Methoxypropan-2-ol	1-methoxypropan-2-ol	107-98-2	CC(COC)O	-2.90309	-3.41225	0.50916	-3.4912	0.58811	-2.888	0.01509	-3.3614	0.45831	-3.31014	0.407053	-4.14	1.23691	t	Dugard et al. 1984
76	m-Cresol	3-methylphenol	108-39-4	CC1=CC(=CC=C1)O	-1.81702	-1.5785	0.238515	-1.67122	0.145795	-1.81914	0.00212497	-1.61456	0.202455	-1.6682	0.148814	-1.81	0.00701503	t	Robert et al. 1977
77	2-Ethoxy ethanol	2-ethoxyethanol	110-80-5	CCOCCO	-3.26281	-3.42442	0.161613	-3.48563	0.222823	-2.87229	0.390517	-3.358	0.0951926	-3.28897	0.0261578	-3.98	0.717193	t	Dugard et al. 1984 Blank et al. 1967
78	2-Ethoxyethyl acetate	2-ethoxyethyl acetate	111-15-9	CCOCCOC(=O)C	-2.9475	-3.22098	0.273482	-3.21692	0.269422	-2.84978	0.0977184	-3.16355	0.216052	-3.32628	0.378783	-3.47	0.522502	t	Dugard et al. 1984 Barber et al. 1992
79	Heptanol	heptan-1-ol	111-70-6	CCCCCCCO	-1.42481	-1.28834	0.136472	-1.4565	0.0316878	-2.29816	0.873348	-1.54916	0.124348	-1.64948	0.224667	-1.41	0.0148122	t	Blank et al. 1967
80	Octanol	octan-1-ol	111-87-5	CCCCCCCCO	-1.21467	-1.36012	0.14545	-1.30477	0.0900998	-2.3886	1.17393	-1.48473	0.27006	-1.35891	0.144235	-1.33	0.11533	t	Blank 1964； MiTagoTi 2000
81	2-(2-Methoxyethoxy) ethanol	2-(2-methoxyethoxy)ethanol	111-77-3	COCCOCCO	-3.68613	-4.52162	0.835487	-4.01404	0.327907	-2.48324	1.20289	-4.25878	0.572647	-4.06286	0.376724	-5.01	1.32387	t	Dugard et al. 1984
82	Cortexolone	(8R,9S,10R,13S,14S,17R)-17-hydroxy-17-(2-hydroxyacetyl)-10,13-dimethyl-2,6,7,8,9,11,12,14,15,16-decahydro-1H-cyclopenta[a]phenanthren-3-one	152-58-9	CC12CCC(=O)C=C1CCC3C2CCC4(C3CCC4(C(=O)CO)O)C	-4.12494	-3.57332	0.551619	-3.98426	0.140679	-2.53441	1.59053	-3.46086	0.664079	-3.99879	0.126146	-2.78	1.34494	t	Scheuplein et al. 1969
83	Diclofenac	2-[2-(2,6-dichloroanilino)phenyl]acetic acid	15307-86-5	C1=CC=C(C(=C1)CC(=O)O)NC2=C(C=CC=C2Cl)Cl	-3	-3.48148	0.48148	-2.34753	0.65247	-2.40268	0.59732	-2.41181	0.58819	-1.22432	1.77568	N/A	N/A	t	Degim et al. 1998
84	Caffeine	1,3,7-Timethylpurine-2,6-dione	58-08-2	CN1C=NC2=C1C(=O)N(C(=O)N2C)C	-3.73613	-3.92826	0.192133	-3.88962	0.153493	-2.65861	1.07752	-3.73881	0.00268268	-4.5473	0.811168	-4.65	0.913873	t	Schäfer-Korting et al. 2006；Netzlaff et al. 2006
85	Flufenamic acid	2-[3-(Tifluoromethyl)anilino]benzoic acid	530-78-9	C1=CC=C(C(=C1)C(=O)O)NC2=CC=CC(=C2)C(F)(F)F	-2.86277	-2.08894	0.773833	-2.65886	0.203913	-2.40206	0.460713	-2.43635	0.426423	-1.36123	1.50154	N/A	N/A	t	Netzlaff et al. 2006
86	Nicotine	3-[(2S)-1-methylpyrrolidin-2-yl]pyridine	54-11-5	CN1CCCC1C2=CN=CC=C2	-1.99	-2.57772	0.58772	-2.14428	0.15428	-2.678	0.688	-2.39638	0.40638	-2.92228	0.93228	-3.11	1.12	t	Qvist et al. 2000
87	m-Nitrophenol	3-nitrophenol	554-84-7	C1=CC(=CC(=C1)O)[N+](=O)[O-]	-2.24872	-2.96727	0.718549	-3.07391	0.825189	-2.43317	0.184449	-2.79197	0.543249	-3.02294	0.774214	-2.01	0.238721	t	Robert et al. 1977
88	Propanol	propan-1-ol	71-23-8	CCCO	-2.86967	-3.0131	0.143434	-2.82703	0.0426362	-2.93758	0.0679138	-2.98851	0.118844	-2.47524	0.394425	-3.18	0.310334	t	Blank 1964；Blank et al. 1967
89	Pentanol	pentan-1-ol	71-41-0	CCCCCO	-2.22185	-2.14599	0.0758587	-2.07596	0.145889	-1.99727	0.224579	-1.96323	0.258619	-2.00815	0.213701	-2.12	0.101849	t	Blank 1964
90	o-Chlorophenol	2-chlorophenol	95-57-8	C1=CC=C(C(=C1)O)Cl	-1.4807	-1.21786	0.262837	-1.46019	0.0205072	-1.49146	0.0107628	-1.35675	0.123947	-1.39307	0.0876279	-1.79	0.309303	t	Robert et al. 1977
91	3,4-Xylenol	3,4-dimethylphenol	95-65-8	CC1=C(C=C(C=C1)O)C	-1.4437	-1.27495	0.168747	-1.37608	0.0676175	-1.71435	0.270653	-1.3399	0.103797	-1.58997	0.146276	-1.68	0.236303	t	Robert et al. 1977
92	Decanol	decan-1-ol	112-30-1	CCCCCCCCCCO	-1.04576	-1.36873	0.322973	-1.29116	0.245403	-2.94408	1.89832	-1.72048	0.674723	-1.02628	0.0194803	-0.99	0.0557575	Ot	MiTagoTi 2000
93	Diethylene glycol monobutyl ether (DGBE) (2-(2-Butoxyethoxy) ethanol)	2-(2-butoxyethoxy)ethanol	112-34-5	CCCCOCCOCCO	-3.76739	-3.84802	0.080635	-2.84075	0.926635	-2.54854	1.21885	-2.98428	0.783105	-3.477	0.290381	-3.76	0.00738502	Ot	Dugard et al. 1984；Barber et al. 1992
94	Diethylene glycol mono butyl ether acetate (DEGBEA) (2-(2-Butoxyethoxy)ethyl acetate)	2-(2-butoxyethoxy)ethyl acetate	124-17-4	CCCCOCCOCCOC(=O)C	-3.72125	-4.15036	0.429114	-2.47129	1.24996	-2.81391	0.907336	-2.90369	0.817556	-3.48406	0.237186	-3.32	0.401246	Ot	Venier et al. 2004
95	Sufentanil	N-[4-(methoxymethyl)-1-(2-thiophen-2-ylethyl)piperidin-4-yl]-N-phenylpropanamide	56030-54-7	CCC(=O)N(C1=CC=CC=C1)C2(CCN(CC2)CCC3=CC=CS3)COC	-1.92082	-5.15263	3.23181	-1.43423	0.486589	-2.24349	0.322671	-1.49909	0.421729	-3.23396	1.31314	-2.38	0.459181	Ot	Roy et al. 1989
96	Sucrose	(2R,3R,4S,5S,6R)-2-[(2S,3S,4S,5R)-3,4-dihydroxy-2,5-bis(hydroxymethyl)oxolan-2-yl]oxy-6-(hydroxymethyl)oxane-3,4,5-Tiol	57-50-1	C(C1C(C(C(C(O1)OC2(C(C(C(O2)CO)O)O)CO)O)O)O)O	-5.284	-10.0688	4.7848	-3.07241	2.21159	-2.403	2.881	-5.32806	0.0440633	-9.61442	4.33042	N/A	N/A	Ot	Venier et al. 2004
†T, t, and o stand for the Taining set, test set, and outlier set, respectively ,
‡Not applicable																18

## Sheet: Table S2 
Table S2. Optimal runtime parameters for the SVR models.
Parameter	SVR A	SVR B	SVR C	HSVR
SVM type	ε-SVR	ε-SVR	ε-SVR	ε-SVR
Kernal type	Radial basis function	Radial basis function	Radial basis function	Radial basis function
γ	8192	2048	0.316406	128
Cost	0.5	0.25	7.49154	0.03125
ε	0.25	0.125	0.00703919	0.03125

## Sheet: Table S3
Table S3. Compound source for the mock test, their names, IUPAC names, CAS numbers, SMILES strings, observed log Pe values, observed log Kp values, and predicted values by SVR A, SVR B, SVR C, and HSVR.
No.	Molecules	IUPAC	CAS	Smiles	Obs. Log Pe (cm/h)	Obs. Log Kp (cm/h)	SVR A	SVR B	SVR C	HSVR	PLS
97	Griseofulvin	(2S,5'R)-7-chloro-3',4,6-trimethoxy-5'-methylspiro[1-benzofuran-2,4'-cyclohex-2-ene]-1',3-dione	126-07-8	CC1CC(=O)C=C(C12C(=O)C3=C(O2)C(=C(C=C3OC)OC)Cl)OC	-1.7237	N/A†	-1.35647	-2.00091	-2.35672	-1.94813	-2.623
98	Methyl phenyl ether (Anisole)	Anisole	100-66-3	COC1=CC=CC=C1	-0.783697	N/A	-1.64849	-1.45505	-1.81879	-1.47722	-1.53952
99	4-Amino-2-nitrophenol	4-amino-2-nitrophenol	119-34-6	C1=CC(=C(C=C1N)[N+](=O)[O-])O	-1.0337	N/A	-3.53604	-3.70428	-2.82934	-3.47214	-3.60203
100	Isoquinoline	Isoquinoline	119-65-3	C1=CC=C2C=NC=CC2=C1	-0.643697	N/A	-1.4005	-1.49094	-1.70052	-1.44226	-1.46465
101	Catechol	Benzene-1,2-diol	120-80-9	C1=CC=C(C(=C1)O)O	-1.8337	N/A	-2.56824	-2.7033	-2.37447	-2.51835	-2.37593
102	Hydroquinone	Benzene-1,4-diol	123-31-9	C1=CC(=CC=C1O)O	-2.3137	N/A	-2.60504	-2.76887	-2.34479	-2.53489	-2.40894
103	Ketoprofen	2-(3-benzoylphenyl)propanoic acid	22071-15-4	CC(C1=CC(=CC=C1)C(=O)C2=CC=CC=C2)C(=O)O	-1.1237	N/A	-1.44044	-1.17094	-2.13096	-1.31006	-1.27913
104	Naproxen	Naproxen	22204-53-1	CC(C1=CC2=C(C=C1)C=C(C=C2)OC)C(=O)O	-0.633697	N/A	-1.42554	-1.1113	-1.98955	-1.22096	-1.35697
105	8-Methoxypsoralen	9-methoxyfuro[3,2-g]chromen-7-one	298-81-7	COC1=C2C(=CC3=C1OC=C3)C=CC(=O)O2	-0.743697	N/A	-1.10853	-1.17098	-1.8113	-1.15346	-1.81677
106	Fluocinonide	[2-[(1S,2S,4R,8S,9S,11S,12R,13S,19S)-12,19-difluoro-11-hydroxy-6,6,9,13-tetramethyl-16-oxo-5,7-dioxapentacyclo[10.8.0.02,9.04,8.013,18]icosa-14,17-dien-8-yl]-2-oxoethyl] acetate	356-12-7	CC(=O)OCC(=O)C12C(CC3C1(CC(C4(C3CC(C5=CC(=O)C=CC54C)F)F)O)C)OC(O2)(C)C	-1.8237	N/A	-4.10541	-3.41398	-2.86158	-3.67888	-3.23976
107	Piroxicam	4-hydroxy-2-methyl-1,1-dioxo-N-pyridin-2-yl-1λ6,2-benzothiazine-3-carboxamide	36322-90-4	CN1C(=C(C2=CC=CC=C2S1(=O)=O)O)C(=O)NC3=CC=CC=N3	-1.1137	N/A	-4.42813	-2.97978	-2.12741	-3.1183	-3.53034
108	5-Ethyl-5-phenylbarbituric acid (Phenobarbital)	5-ethyl-5-phenyl-1,3-diazinane-2,4,6-trione	50-06-6	CCC1(C(=O)NC(=O)NC1=O)C2=CC=CC=C2	-2.4937	N/A	-3.23896	-2.71316	-2.66984	-2.81132	-3.23622
109	Prednisolone	(8S,9S,10R,11S,13S,14S,17R)-11,17-dihydroxy-17-(2-hydroxyacetyl)-10,13-dimethyl-7,8,9,11,12,14,15,16-octahydro-6H-cyclopenta[a]phenanthren-3-one	50-24-8	CC12CC(C3C(C1CCC2(C(=O)CO)O)CCC4=CC(=O)C=CC34C)O	-2.8637	N/A	-4.79434	-3.69605	-2.9124	-4.38866	-3.72609
110	Flurbiprofen	2-(3-fluoro-4-phenylphenyl)propanoic acid	5104-49-4	CC(C1=CC(=C(C=C1)C2=CC=CC=C2)F)C(=O)O	-0.133697	N/A	-0.927558	-1.06574	-2.40048	-1.10397	-0.417816
111	5-Fluorouracil	5-fluoro-1H-pyrimidine-2,4-dione	51-21-8	C1=C(C(=O)NC(=O)N1)F	-2.2137	N/A	-4.35359	-3.94219	-2.59794	-4.09556	-3.82556
112	2-Nitro-p-phenylenediamine	2-nitrobenzene-1,4-diamine	5307-14-2	C1=CC(=C(C=C1N)[N+](=O)[O-])N	-1.6937	N/A	-5.29385	-4.17506	-2.6979	-5.22278	-4.12184
113	Indomethacine	2-[1-(4-chlorobenzoyl)-5-methoxy-2-methylindol-3-yl]acetic acid	53-86-1	CC1=C(C2=C(N1C(=O)C3=CC=C(C=C3)Cl)C=CC(=C2)OC)CC(=O)O	-0.843697	N/A	-2.71765	-1.79291	-2.39929	-1.9656	-0.993145
114	5,5-Diethylbarbituric acid (Barbital)	5,5-diethyl-1,3-diazinane-2,4,6-trione	57-44-3	CCC1(C(=O)NC(=O)NC1=O)CC	-2.1937	N/A	-3.26797	-3.27113	-3.04361	-3.29765	-3.35209
115	Aminopyrine	4-(dimethylamino)-1,5-dimethyl-2-phenylpyrazol-3-one	58-15-1	CC1=C(C(=O)N(N1C)C2=CC=CC=C2)N(C)C	-2.1137	N/A	-2.779	-2.0226	-2.46216	-2.1793	-2.98952
116	Aniline	Aniline	62-53-3	C1=CC=C(C=C1)N	-0.993697	N/A	-2.29273	-2.26001	-2.47626	-2.32825	-2.10507
117	Digitoxin	3-[(3S,5R,8R,9S,10S,13R,14S,17R)-3-[(2R,4S,5S,6R)-5-[(2S,4S,5S,6R)-5-[(2S,4S,5S,6R)-4,5-dihydroxy-6-methyloxan-2-yl]oxy-4-hydroxy-6-methyloxan-2-yl]oxy-4-hydroxy-6-methyloxan-2-yl]oxy-14-hydroxy-10,13-dimethyl-1,2,3,4,5,6,7,8,9,11,12,15,16,17-tetradecahydrocyclopenta[a]phenanthren-17-yl]-2H-furan-5-one	71-63-6	CC1C(C(CC(O1)OC2C(OC(CC2O)OC3C(OC(CC3O)OC4CCC5(C(C4)CCC6C5CCC7(C6(CCC7C8=CC(=O)OC8)O)C)C)C)C)O)O	-0.233697	N/A	-1.58711	-6.54641	-2.403	-1.02822	-5.9074
118	Benzyl nicotinate	Benzyl pyridine-3-carboxylate	94-44-0	C1=CC=C(C=C1)COC(=O)C2=CN=CC=C2	-0.603697	N/A	-1.06174	-1.16272	-1.89602	-1.14111	-1.85641
119	o-Phenylenediamine	Benzene-1,2-diamine	95-54-5	C1=CC=C(C(=C1)N)N	-1.8637	N/A	-2.96223	-3.03088	-2.76881	-2.96767	-2.71582
13	2,4-Dichlorophenol	2,4-dichlorophenol	120-83-2	C1=CC(=C(C=C1Cl)Cl)O	-0.363697	-1.22141	N/A	N/A	N/A	N/A	N/A
68	2-Isopropyl-5-Methylphenol (Thymol)	5-methyl-2-propan-2-ylphenol	89-83-8	OC1=CC(=CC=C1C(C)C)C	-0.453697	-1.27737	N/A	N/A	N/A	N/A	N/A
76	3-Methylphenol (m-Cresol)	3-methylphenol	108-39-4	CC1=CC(=CC=C1)O	-0.773697	-1.81702	N/A	N/A	N/A	N/A	N/A
3	4-Chlorophenol	4-chlorophenol	106-48-9	C1=CC(=CC=C1O)Cl	-0.713697	-1.44009	N/A	N/A	N/A	N/A	N/A
14	4-Ethylphenol	4-ethylphenol	123-07-9	CCC1=CC=C(C=C1)O	-0.633697	-1.45767	N/A	N/A	N/A	N/A	N/A
18	4-Hydroxy-methylphenylacetate	Methyl 2-(4-hydroxyphenyl)acetate	14199-15-6	COC(=O)CC1=CC=C(C=C1)O	-1.5137	-1.69897	N/A	N/A	N/A	N/A	N/A
22	4-Hydroxyphenylacetamide	2-(4-hydroxyphenyl)acetamide	17194-82-0	C1=CC(=CC=C1CC(=O)N)O	-2.5137	-3.34679	N/A	N/A	N/A	N/A	N/A
1	4-Nitrophenol	4-Nitrophenol	100-02-7	C1=CC(=CC=C1[N+](=O)[O-])O	-1.3537	-2.25337	N/A	N/A	N/A	N/A	N/A
51	Benzoic acid	Benzoic acid	65-85-0	C1=CC=C(C=C1)C(=O)O	-1.2637	-1.87664	N/A	N/A	N/A	N/A	N/A
46	4-Hydroxybenzyl alcohol	4-(hydroxymethyl)phenol	623-05-2	C1=CC(=CC=C1CO)O	-2.2937	-2.69897	N/A	N/A	N/A	N/A	N/A
84	Caffeine	1,3,7-trimethylpurine-2,6-dione	58-08-2	CN1C=NC2=C1C(=O)N(C(=O)N2C)C	-1.8937	-3.73613	N/A	N/A	N/A	N/A	N/A
82	Cortexolone	(8R,9S,10R,13S,14S,17R)-17-hydroxy-17-(2-hydroxyacetyl)-10,13-dimethyl-2,6,7,8,9,11,12,14,15,16-decahydro-1H-cyclopenta[a]phenanthren-3-one	152-58-9	CC12CCC(=O)C=C1CCC3C2CCC4(C3CCC4(C(=O)CO)O)C	-1.8937	-4.12494	N/A	N/A	N/A	N/A	N/A
28	Corticosterone	(8S,9S,10R,11S,13S,14S,17S)-11-hydroxy-17-(2-hydroxyacetyl)-10,13-dimethyl-1,2,6,7,8,9,11,12,14,15,16,17-dodecahydrocyclopenta[a]phenanthren-3-one	50-22-6	CC12CCC(=O)C=C1CCC3C2C(CC4(C3CCC4C(=O)CO)C)O	-2.0337	-4.06215	N/A	N/A	N/A	N/A	N/A
34	Cortisone	(8S,9S,10R,13S,14S,17R)-17-hydroxy-17-(2-hydroxyacetyl)-10,13-dimethyl-1,2,6,7,8,9,12,14,15,16-decahydrocyclopenta[a]phenanthrene-3,11-dione	53-06-5	CC12CCC(=O)C=C1CCC3C2C(=O)CC4(C3CCC4(C(=O)CO)O)C	-2.5337	-5	N/A	N/A	N/A	N/A	N/A
27	Dexamethasone	(8S,9R,10S,11S,13S,14S,16R,17R)-9-fluoro-11,17-dihydroxy-17-(2-hydroxyacetyl)-10,13,16-trimethyl-6,7,8,11,12,14,15,16-octahydrocyclopenta[a]phenanthren-3-one	50-02-2	CC1CC2C3CCC4=CC(=O)C=CC4(C3(C(CC2(C1(C(=O)CO)O)C)O)F)C	-2.6937	-4.19382	N/A	N/A	N/A	N/A	N/A
83	Diclofenac	2-[2-(2,6-dichloroanilino)phenyl]acetic acid	15307-86-5	C1=CC=C(C(=C1)CC(=O)O)NC2=C(C=CC=C2Cl)Cl	-0.233697	-3	N/A	N/A	N/A	N/A	N/A
30	Estradiol	(8R,9S,13S,14S,17S)-13-methyl-6,7,8,9,11,12,14,15,16,17-decahydrocyclopenta[a]phenanthrene-3,17-diol	17916-67-5	CC12CCC3C(C1CCC2O)CCC4=C3C=CC(=C4)O	-0.593697	-2.47023	N/A	N/A	N/A	N/A	N/A
29	Hydrocortisone	(8S,9S,10R,11S,13S,14S,17R)-11,17-dihydroxy-17-(2-hydroxyacetyl)-10,13-dimethyl-2,6,7,8,9,11,12,14,15,16-decahydro-1H-cyclopenta[a]phenanthren-3-one	50-23-7	CC12CCC(=O)C=C1CCC3C2C(CC4(C3CCC4(C(=O)CO)O)C)O	-2.6137	-5.52288	N/A	N/A	N/A	N/A	N/A
53	Hydroxyprogesterone	(8R,9S,10R,13S,14S,17R)-17-acetyl-17-hydroxy-10,13-dimethyl-2,6,7,8,9,11,12,14,15,16-decahydro-1H-cyclopenta[a]phenanthren-3-one	68-96-2	CC(=O)C1(CCC2C1(CCC3C2CCC4=CC(=O)CCC34C)C)O	-1.1437	-3.22185	N/A	N/A	N/A	N/A	N/A
21	Ibuprofen	2-[4-(2-methylpropyl)phenyl]propanoic acid	15687-27-1	CC(C)CC1=CC=C(C=C1)C(C)C(=O)O	-0.0536975	-1.44	N/A	N/A	N/A	N/A	N/A
73	Methyl 4-hydroxybenzoate (Methyl paraben)	Methyl 4-hydroxybenzoate	99-76-3	COC(=O)C1=CC=C(C=C1)O	-1.3237	-1.67358	N/A	N/A	N/A	N/A	N/A
41	Progesterone	(8S,9S,10R,13S,14S,17S)-17-acetyl-10,13-dimethyl-1,2,6,7,8,9,11,12,14,15,16,17-dodecahydrocyclopenta[a]phenanthren-3-one	57-83-0	CC(=O)C1CCC2C1(CCC3C2CCC4=CC(=O)CCC34C)C	-0.573697	-1.96859	N/A	N/A	N/A	N/A	N/A
43	Testosterone	(8R,9S,10R,13S,14S,17S)-17-hydroxy-10,13-dimethyl-1,2,6,7,8,9,11,12,14,15,16,17-dodecahydrocyclopenta[a]phenanthren-3-one	58-22-0	CC12CCC3C(C1CCC2O)CCC4=CC(=O)CCC34C	-0.963697	-2.90802	N/A	N/A	N/A	N/A	N/A
†Not applicable
